# Supplementary material for: The TRPV4 Agonist GSK1016790A Regulates the Membrane Expression of TRPV4 Channels
Source: PubMed Central journal article supplement (PMC6351496; doi:10.3389/fphar.2019.00006), 2019-01-23
Supplement: Image_1.pdf [file Image_1.pdf]

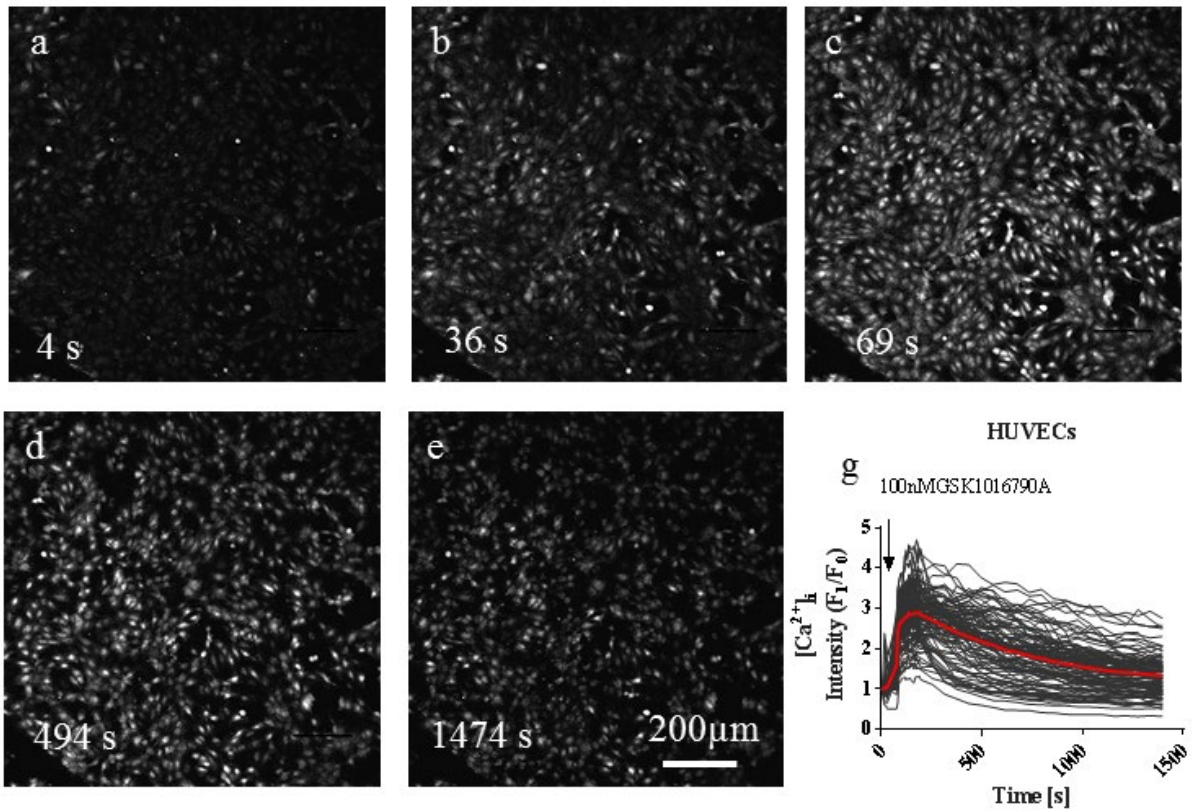

Supplementary 1. Calcium imaging experiment showing the effect of GSK101 on  $[Ca^{2+}]_i$  level of HUVECs. a-e Representative images selected from Movie 1. g. Black lines in graph represent single cell responses, and red line represents average cellular responses.
